# Supplementary material for: Identifying Objective Physiological Markers and Modifiable Behaviors for Self-Reported Stress and Mental Health Status Using Wearable Sensors and Mobile Phones: Observational Study
Source: PubMed Central journal article supplement (PMC6015266; doi:10.2196/jmir.9410), 2018-06-08
Supplement: jmir_v20i6e210_app4.pdf [file jmir_v20i6e210_app4.pdf]

Multimedia Appendix 4. Performance of PSS and MCS classification models with one month or last week of data.

|                          | PSS (high or low) |      |           |      | MCS (high or low) |      |           |      |
|--------------------------|-------------------|------|-----------|------|-------------------|------|-----------|------|
|                          | One month         |      | Last week |      | One month         |      | Last week |      |
|                          | Accuracy          | F1   | Accuracy  | F1   | Accuracy          | F1   | Accuracy  | F1   |
| <b>All</b>               |                   |      |           |      |                   |      |           |      |
| LASSO                    | 67.6              | 0.74 | 76.3      | 0.78 | 58.1              | 0.55 | 37.5      | 0.17 |
| SVM linear               | 70.3              | 0.72 | 65.0      | 0.70 | 65.8              | 0.67 | 75.0      | 0.75 |
| SVM RBF                  | 81.5              | 0.83 | 82.5      | 0.84 | 77.2              | 0.78 | 81.3      | 0.82 |
| <b>Big Five + Gender</b> |                   |      |           |      |                   |      |           |      |
| LASSO                    | 71.9              | 0.75 | 71.9      | 0.75 | 82.6              | 0.84 | 82.6      | 0.84 |
| SVM linear               | 68.8              | 0.71 | 68.8      | 0.71 | 82.6              | 0.84 | 82.6      | 0.84 |
| SVM RBF                  | 71.4              | 0.75 | 71.4      | 0.75 | 84.7              | 0.85 | 84.7      | 0.85 |
| <b>Sensor</b>            |                   |      |           |      |                   |      |           |      |
| LASSO                    | 56.8              | 0.68 | 59.6      | 0.73 | 59.4              | 0.60 | 45.0      | 0.27 |
| SVM linear               | 58.3              | 0.59 | 63.4      | 0.67 | 75.9              | 0.77 | 67.5      | 0.68 |
| SVM RBF                  | 78.3              | 0.80 | 73.8      | 0.76 | 85.1              | 0.88 | 70.0      | 0.70 |
| <b>Phone</b>             |                   |      |           |      |                   |      |           |      |
| LASSO                    | 44.1              | 0.53 | 39.6      | 0.39 | 54.4              | 0.56 | 47.1      | 0.47 |
| SVM linear               | 57.5              | 0.60 | 47.9      | 0.57 | 60.0              | 0.59 | 64.7      | 0.60 |
| SVM RBF                  | 64.2              | 0.67 | 63.2      | 0.62 | 71.1              | 0.71 | 73.5      | 0.73 |
| <b>Objective</b>         |                   |      |           |      |                   |      |           |      |
| LASSO                    | 53.0              | 0.63 | 53.9      | 0.67 | 53.0              | 0.59 | 50.0      | 0.29 |
| SVM linear               | 65.9              | 0.67 | 53.0      | 0.61 | 75.9              | 0.77 | 70.0      | 0.71 |
| SVM RBF                  | 70.1              | 0.73 | 69.6      | 0.73 | 86.1              | 0.88 | 73.3      | 0.75 |
| <b>Behaviors</b>         |                   |      |           |      |                   |      |           |      |
| LASSO                    | 46.9              | 0.60 | 37.2      | 0.35 | 54.7              | 0.54 | 68.8      | 0.74 |
| SVM linear               | 61.2              | 0.61 | 59.0      | 0.61 | 70.6              | 0.67 | 81.3      | 0.84 |
| SVM RBF                  | 73.5              | 0.76 | 69.2      | 0.71 | 78.7              | 0.76 | 87.5      | 0.89 |
