# Supplementary material for: Identifying Objective Physiological Markers and Modifiable Behaviors for Self-Reported Stress and Mental Health Status Using Wearable Sensors and Mobile Phones: Observational Study
Source: PubMed Central journal article supplement (PMC6015266; doi:10.2196/jmir.9410), 2018-06-08
Supplement: jmir_v20i6e210_app7.pdf [file jmir_v20i6e210_app7.pdf]

Mean and standard deviation of accuracy and F1 scores from leave-one-cohort-out PSS and MCS classification models with one month of data and SVM RBF.

|                 |     |      | All  | Big Five+Gender | Sensor | Phone | Objective | Behaviors |
|-----------------|-----|------|------|-----------------|--------|-------|-----------|-----------|
| <b>Accuracy</b> |     |      |      |                 |        |       |           |           |
|                 | PSS |      |      |                 |        |       |           |           |
|                 |     | Mean | 78.5 | 75.2            | 82.7   | 77.9  | 75.0      | 80.7      |
|                 |     | SD   | 16.8 | 14.1            | 14.4   | 14.1  | 9.3       | 14.1      |
|                 | MCS |      |      |                 |        |       |           |           |
|                 |     | Mean | 77.8 | 91.0            | 88.8   | 77.9  | 88.8      | 76.8      |
|                 |     | SD   | 16.1 | 6.0             | 14.1   | 31.6  | 14.1      | 23.7      |
| <b>F1</b>       |     |      |      |                 |        |       |           |           |
|                 | PSS |      |      |                 |        |       |           |           |
|                 |     | Mean | 0.84 | 0.80            | 0.83   | 0.78  | 0.75      | 0.77      |
|                 |     | SD   | 0.11 | 0.12            | 0.06   | 0.07  | 0.10      | 0.10      |
|                 | MCS |      |      |                 |        |       |           |           |
|                 |     | Mean | 0.78 | 0.92            | 0.90   | 0.79  | 0.90      | 0.74      |
|                 |     | SD   | 0.18 | 0.05            | 0.14   | 0.29  | 0.14      | 0.29      |
