# Supplementary material for: Identifying Objective Physiological Markers and Modifiable Behaviors for Self-Reported Stress and Mental Health Status Using Wearable Sensors and Mobile Phones: Observational Study
Source: PubMed Central journal article supplement (PMC6015266; doi:10.2196/jmir.9410), 2018-06-08
Supplement: jmir_v20i6e210_app10.pdf [file jmir_v20i6e210_app10.pdf]

Percentages of time each feature was selected for each fold of leave-one-cohort-out cross validation for one month PSS models.

| Features used for PSS model (one month)      | Leave-one-cohort-out cross validation folds |     |     |     |     |
|----------------------------------------------|---------------------------------------------|-----|-----|-----|-----|
|                                              | 1                                           | 2   | 3   | 4   | 5   |
| Neuroticism                                  | 100                                         | 100 | 100 | 100 | 50  |
| Conscientiousness                            | 50                                          | 100 | 50  | 50  | 100 |
| Screen 0 AM to 24 AM mean time stamp: median | 67                                          | 0   | 0   | 33  | 100 |
| Mobility total distance a day: median        | 25                                          | 25  | 0   | 50  | 25  |
| Extracurricular activity duration: SD        | 50                                          | 0   | 50  | 50  | 0   |
| Mobility 5-min distance SD: median           | 25                                          | 0   | 25  | 25  | 50  |
| SC 9 AM to 6 PM median amplitude: mean       | 0                                           | 33  | 33  | 0   | 33  |
| SC 9 AM to 6 PM max amplitude: mean          | 0                                           | 0   | 33  | 0   | 67  |
| SC 9 AM to 6 PM mean amplitude: mean         | 0                                           | 0   | 0   | 0   | 100 |
| Call 0 AM to 24 AM median time stamp: mean   | 0                                           | 0   | 50  | 25  | 25  |
| Mobility 5-min distance mean: median         | 25                                          | 0   | 0   | 50  | 25  |
| Mobility radius median                       | 25                                          | 0   | 0   | 25  | 50  |
| ST 6 PM to 0 AM min: SD                      | 33                                          | 0   | 0   | 67  | 33  |
| Screen 0 AM to 24 AM median time stamp: SD   | 50                                          | 25  | 0   | 0   | 25  |
| Call 0 AM to 24 AM SD duration: median       | 25                                          | 0   | 0   | 25  | 25  |
| Call 0 AM to 24 AM total number: median      | 50                                          | 0   | 0   | 0   | 25  |
| Call 0 AM to 24 AM unique number: median     | 0                                           | 25  | 25  | 25  | 0   |
